# Supplementary material for: Shape-selective synthesis of NiO nanostructures for hydrazine oxidation as a nonenzymatic amperometric sensor
Source: Royal Society of Chemistry journal article supplement (doi:10.1039/c6ra12805j), 2016-01-01
Supplement: c6ra12805j1.pdf [file c6ra12805j1.pdf]

Supporting Information

## Shape-Selective Synthesis of NiO Nanostructures for Hydrazine Oxidation as a Nonenzymatic Amperometric Sensor

Dhanasekaran Vikraman<sup>a</sup>, Hui Joon Park<sup>a,b\*</sup>

<sup>a</sup>Division of Energy Systems Research, Ajou University, Suwon 16499, Republic of Korea

<sup>b</sup>Department of Electrical and Computer Engineering, Ajou University, Suwon 16499, Republic of Korea

\* Corresponding author E.mail: huijoon@ajou.ac.kr

**Table S1. Size and Shape of the NiO nanostructures by TEM and XRD**

| Type of reducing agents         | Crystallite size<br>by XRD<br>nm | Size and Shape by TEM |                    |
|---------------------------------|----------------------------------|-----------------------|--------------------|
|                                 |                                  | Shape                 | Size<br>(width) nm |
| NaOH with PEG                   | 4.66                             | Nano-pellet           | ~3-4               |
| NaOH                            | 3.08                             | Nano-rods             | ~2-3               |
| NH <sub>3</sub>                 | 2.71                             | Nano-dots             | ~2-3               |
| Na <sub>2</sub> CO <sub>3</sub> | 12.51                            | Cuboid                | ~10-20             |

**Table S2. Characteristics of NiO@SiO<sub>2</sub> samples determined by N<sub>2</sub> sorption**

| <b>Type of reducing agents</b>  | <b>Shape of NiO</b> | <b>S<sub>BET</sub> (m<sup>2</sup>/g)</b> | <b>Pore volume (cm<sup>3</sup>/g)</b> |
|---------------------------------|---------------------|------------------------------------------|---------------------------------------|
| NaOH with PEG                   | Nano-pellet         | 19.3                                     | 0.1098                                |
| NaOH                            | Nano-rods           | 22.5                                     | 0.1375                                |
| NH <sub>3</sub>                 | Nano-dots           | 32.7                                     | 0.1786                                |
| Na <sub>2</sub> CO <sub>3</sub> | Cuboid              | 47.3                                     | 0.2569                                |

**Table S3. Electrocatalytic activity of NiO and NiO-silica core shell nanostructures**

| Type of reducing agents         | Shape of NiO | Electrocatalytic activity towards hydrazine oxidation<br>$\text{mA}\cdot\text{g}^{-1}$ |                      |
|---------------------------------|--------------|----------------------------------------------------------------------------------------|----------------------|
|                                 |              | NiO                                                                                    | NiO@SiO <sub>2</sub> |
| NaOH with PEG                   | Nano-pellet  | 953                                                                                    | 231                  |
| NaOH                            | Nano-rods    | 396                                                                                    | 298                  |
| NH <sub>3</sub>                 | Nano-dots    | 310                                                                                    | 155                  |
| Na <sub>2</sub> CO <sub>3</sub> | Cuboid       | 503                                                                                    | 325                  |

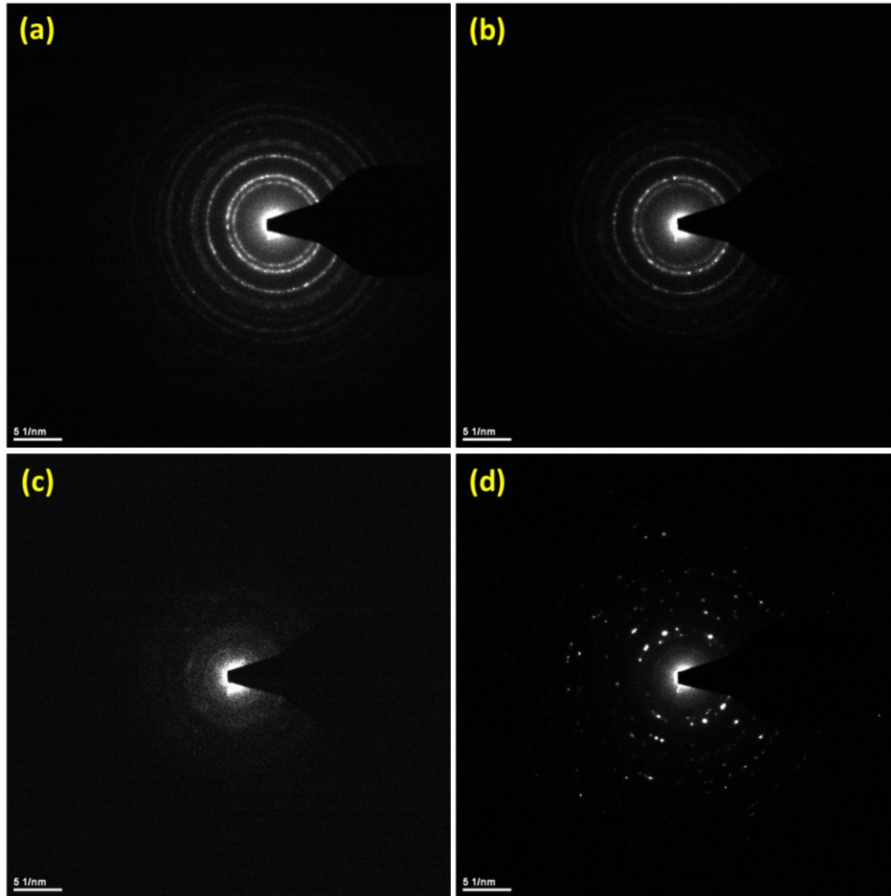

**Figure S1.** SAED patterns of NiO nanostructures prepared using different reducing agents such as (a) NaOH with PEG, (b) NaOH without PEG, (c)  $\text{NH}_3$  and (d)  $\text{Na}_2\text{CO}_3$ .

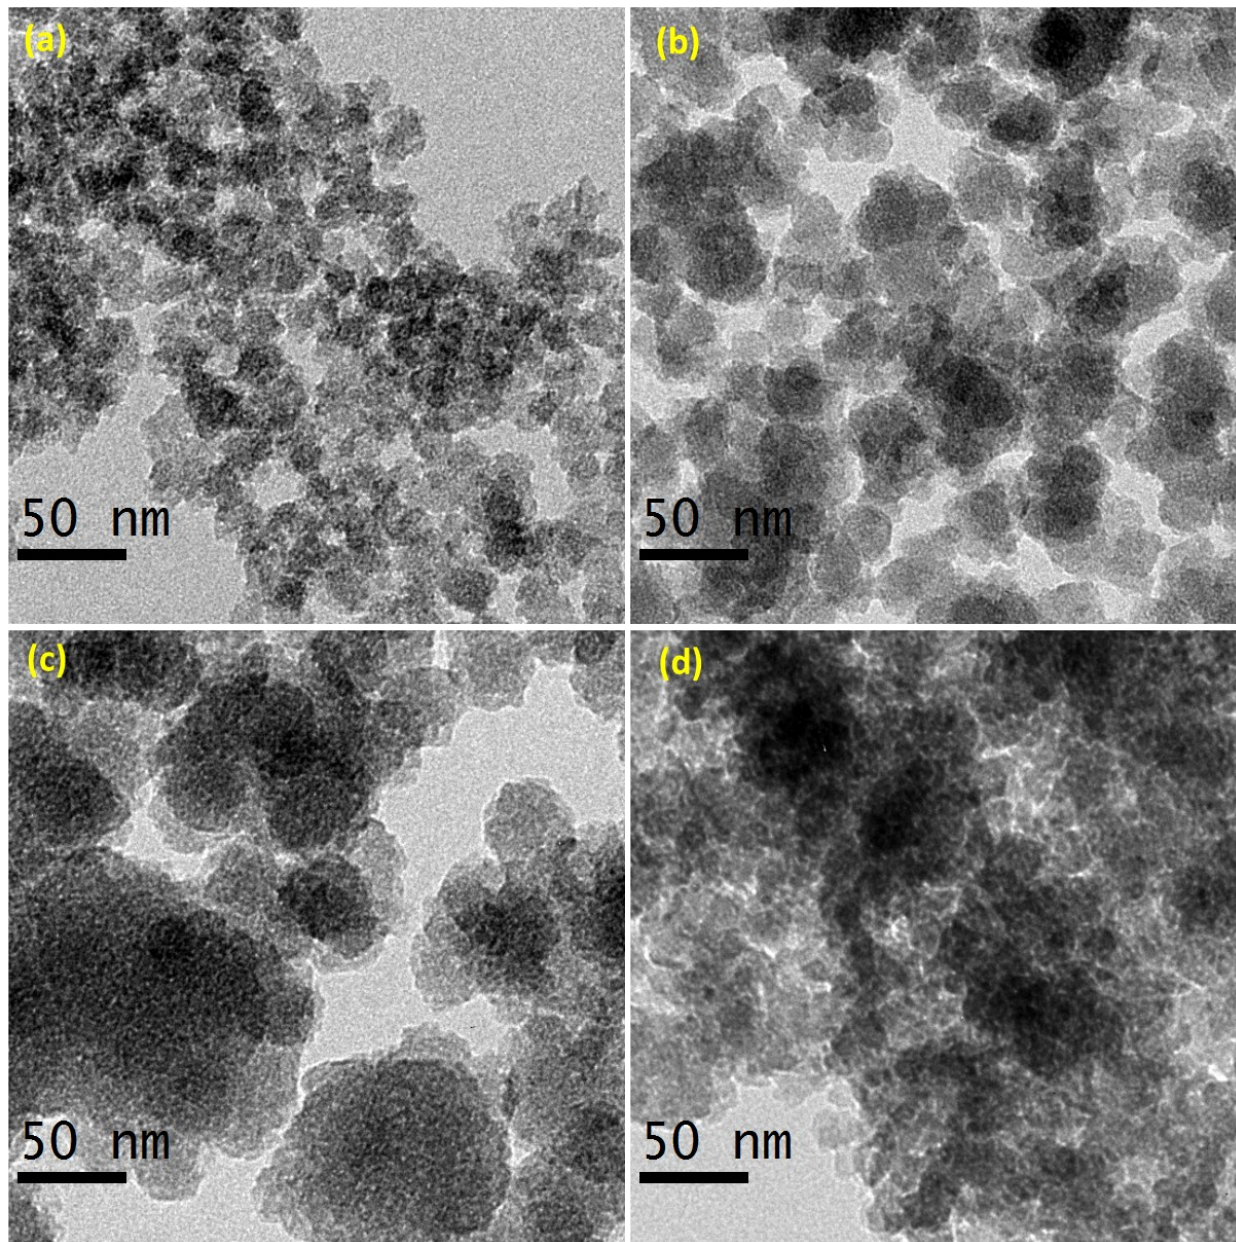

**Fig. S2.** TEM images of NiO@SiO<sub>2</sub> nanostructures prepared for different reducing agents using NiO (a) NaOH with PEG, (b) NaOH without PEG, (c) NH<sub>3</sub> and (d) Na<sub>2</sub>CO<sub>3</sub>.

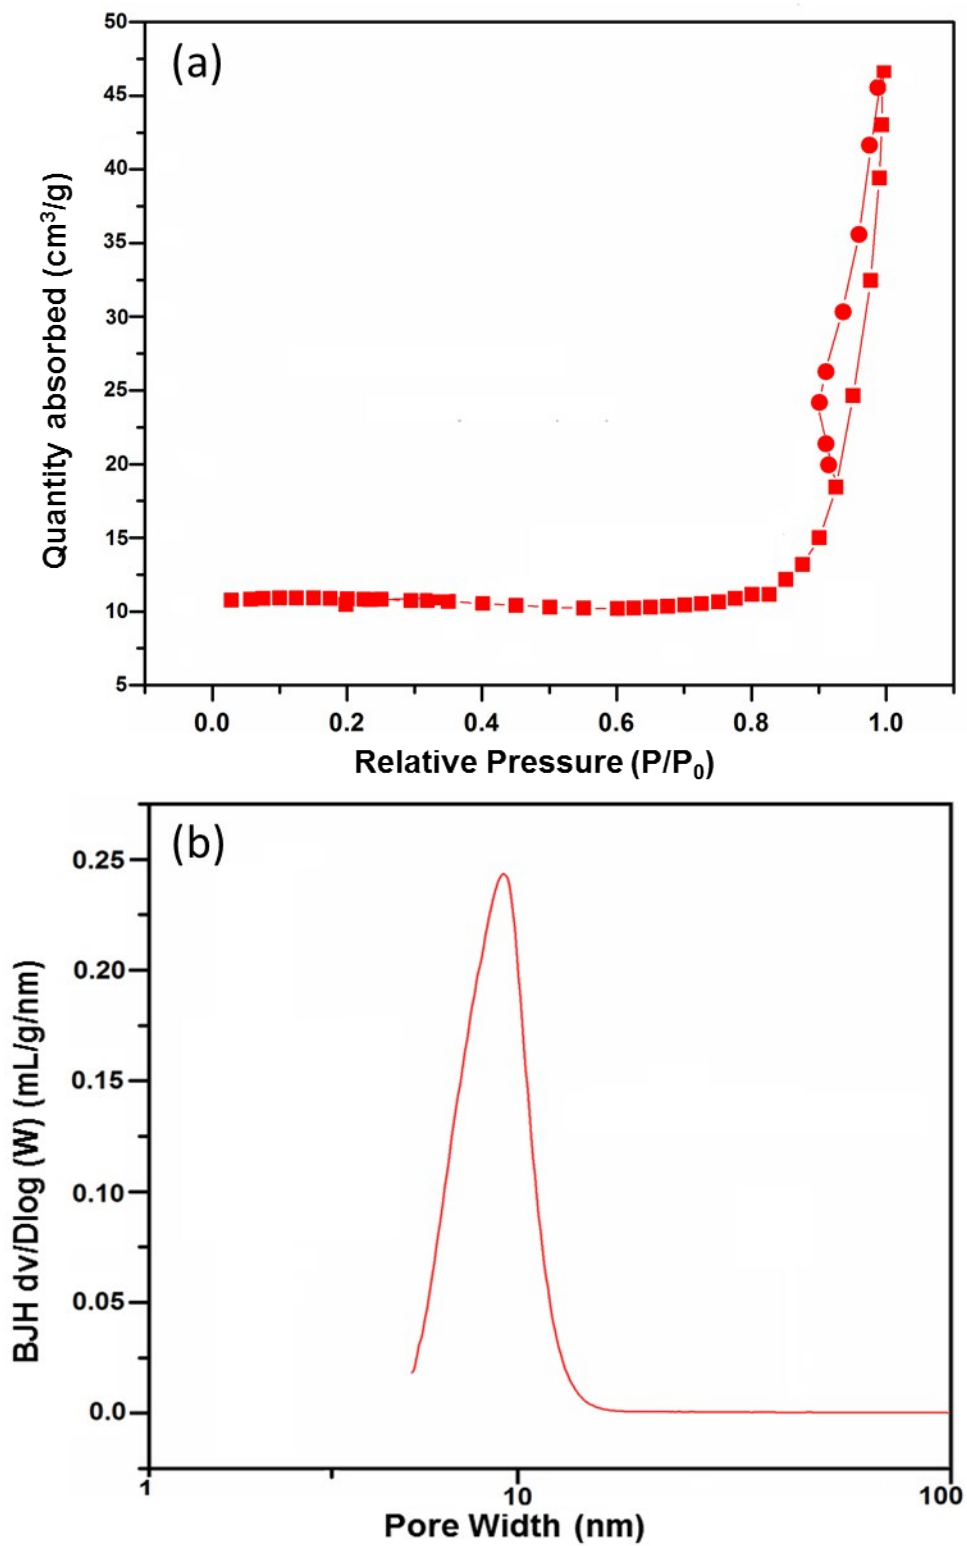

**Fig. S3.** Adsorption and desorption isotherm of N<sub>2</sub> and pore size distribution of cuboid shape NiO@SiO<sub>2</sub> structure.

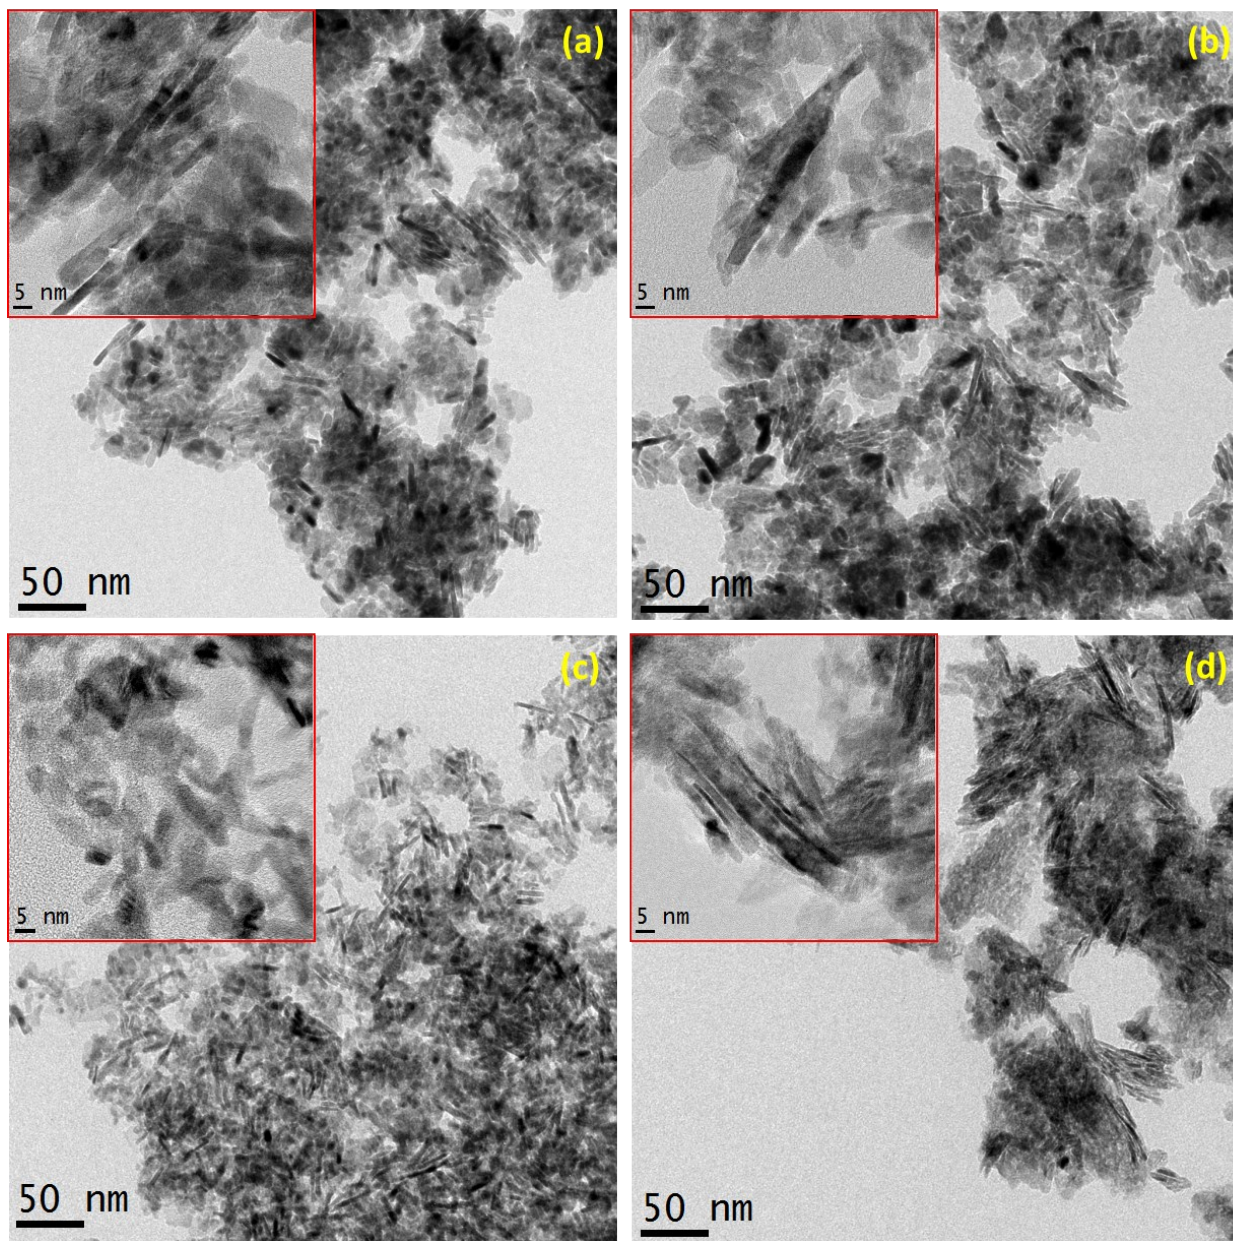

**Fig. S4.** TEM images of NiO nanostructures prepared at different solution bath temperatures with using NaOH with PEG as a reducing agent (a) 40 °C, (b) 55 °C, (c) 70 °C and (d) 85 °C. (c) is the same image as Figure 2a.

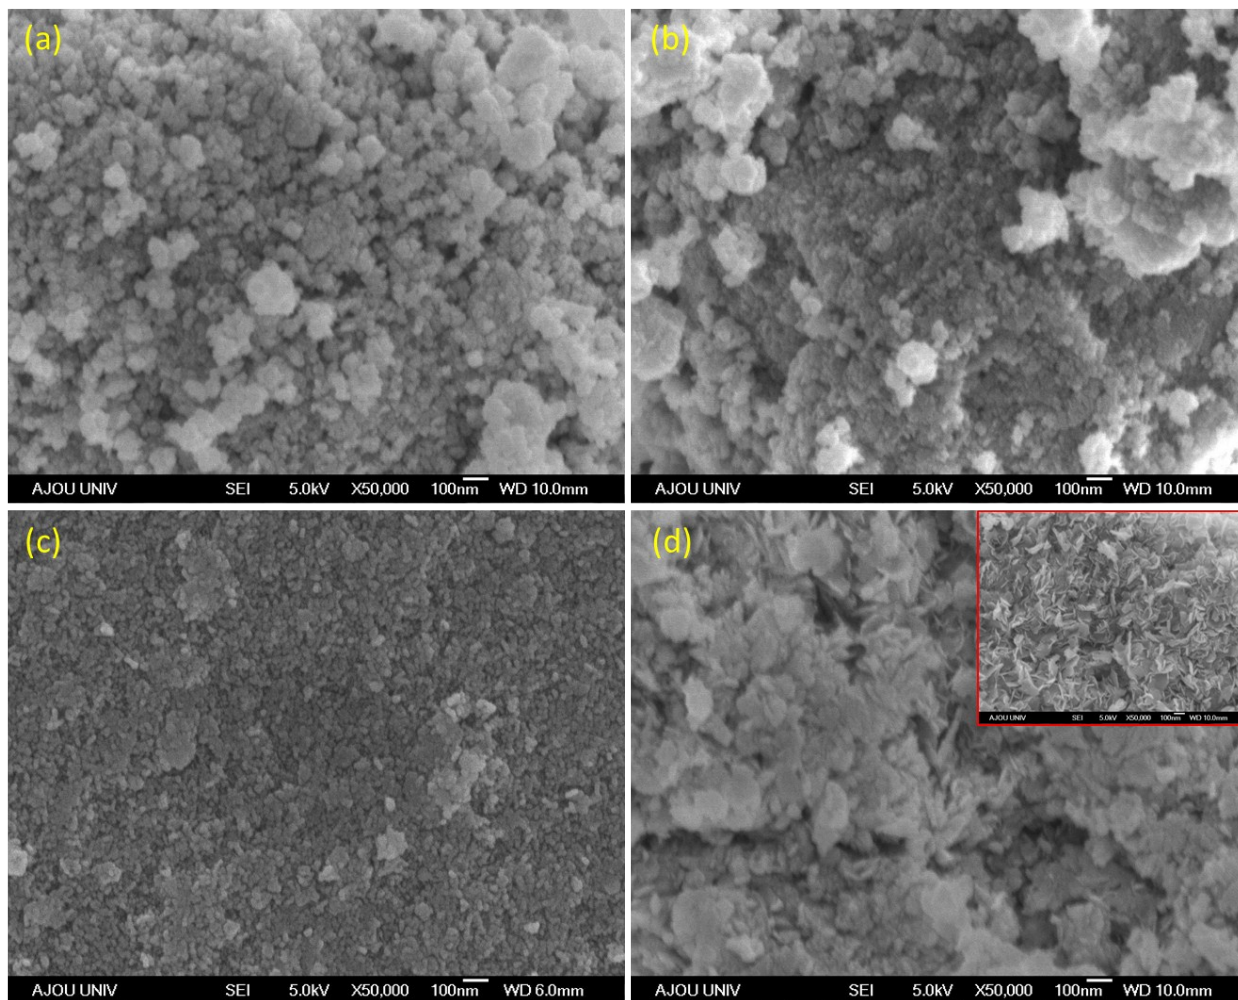

**Fig. S5.** SEM micrographs of NiO nanostructures prepared at different solution bath temperatures with using NaOH with PEG as a reducing agent (a) 40 °C, (b) 55 °C, (c) 70 °C and (d) 85 °C. (c) is the same image as Figure 1a.



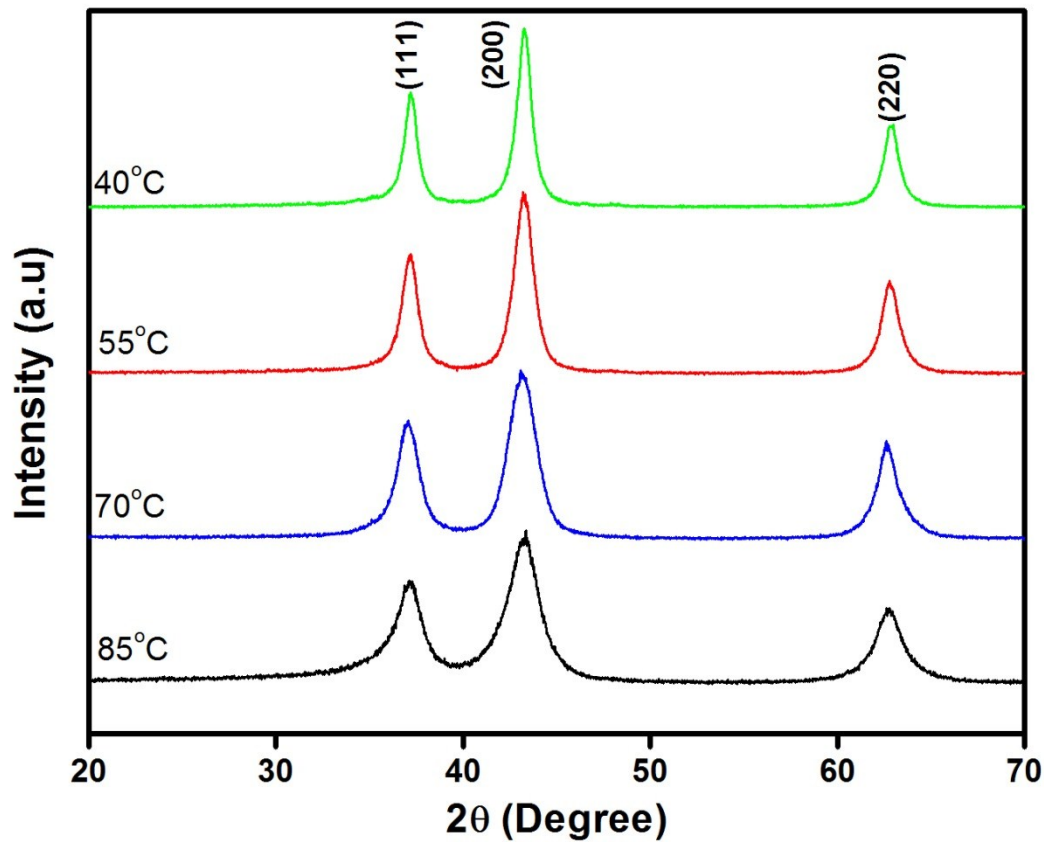

**Fig. S6.** X-ray diffraction patterns of NiO nanostructures reduced using NaOH with PEG at different solution bath temperatures.

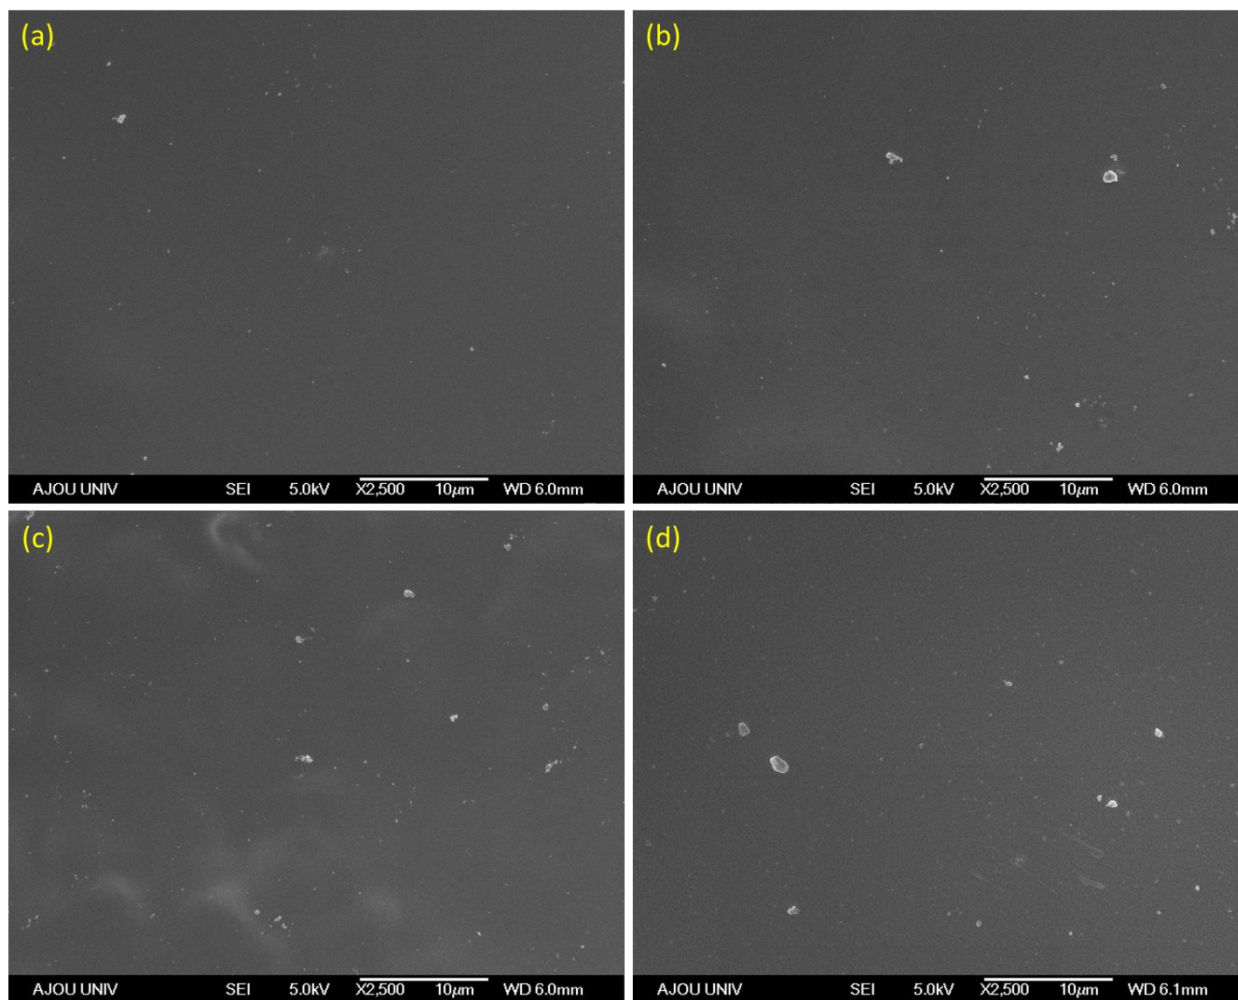

**Fig. S7.** SEM micrographs of Nafion/NiO/GC electrode surface. NiO prepared using different reducing agents (a) NaOH with PEG, (b) NaOH without PEG, (c)  $\text{NH}_3$  and (d)  $\text{Na}_2\text{CO}_3$ .

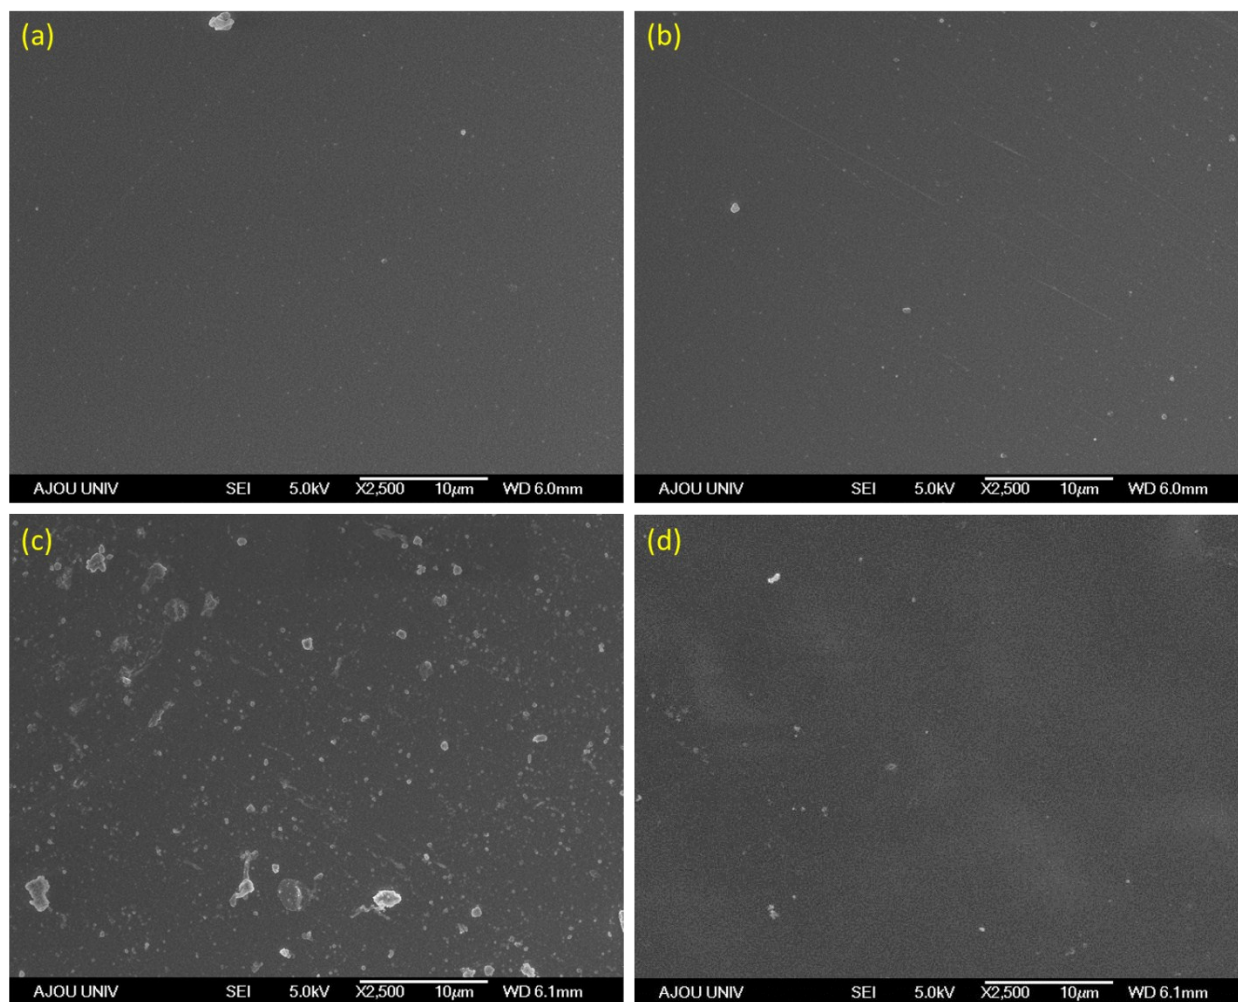

**Fig. S8.** SEM micrographs of Nafion/NiO@SiO<sub>2</sub>/GC electrode surface. NiO prepared using different reducing agents (a) NaOH with PEG, (b) NaOH without PEG, (c) NH<sub>3</sub> and (d) Na<sub>2</sub>CO<sub>3</sub>.

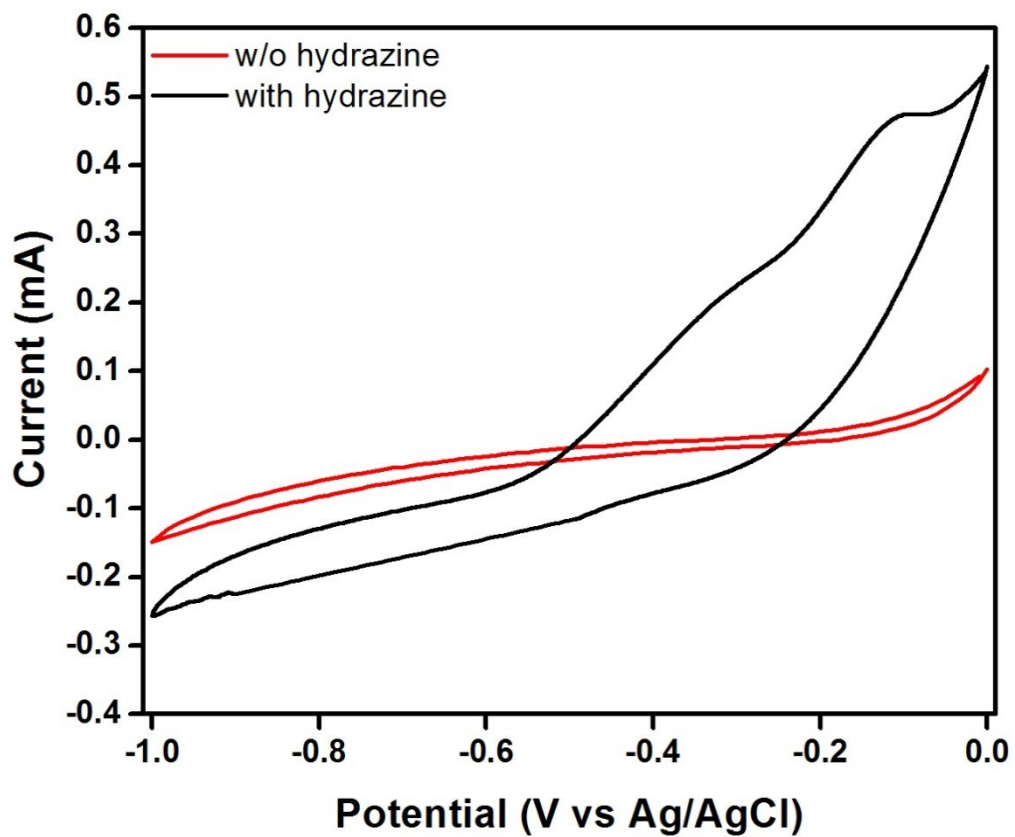

**Fig. S9.** Cyclic voltammograms of the Nafion/NiO/GC electrode in 0.025 M NaOH with and without hydrazine hydrate (0.1 M) at 100  $\text{mV}\cdot\text{s}^{-1}$  scan rates.
